# Supplementary material for: Interleukin-26 Has Synergistic Catabolic Effects with Palmitate in Human Articular Chondrocytes via the TLR4-ERK1/2-c-Jun Signaling Pathway
Source: MDPI journal article supplement (doi:10.3390/cells10092500), 2021-09-21
Supplement: s1 [file s1]

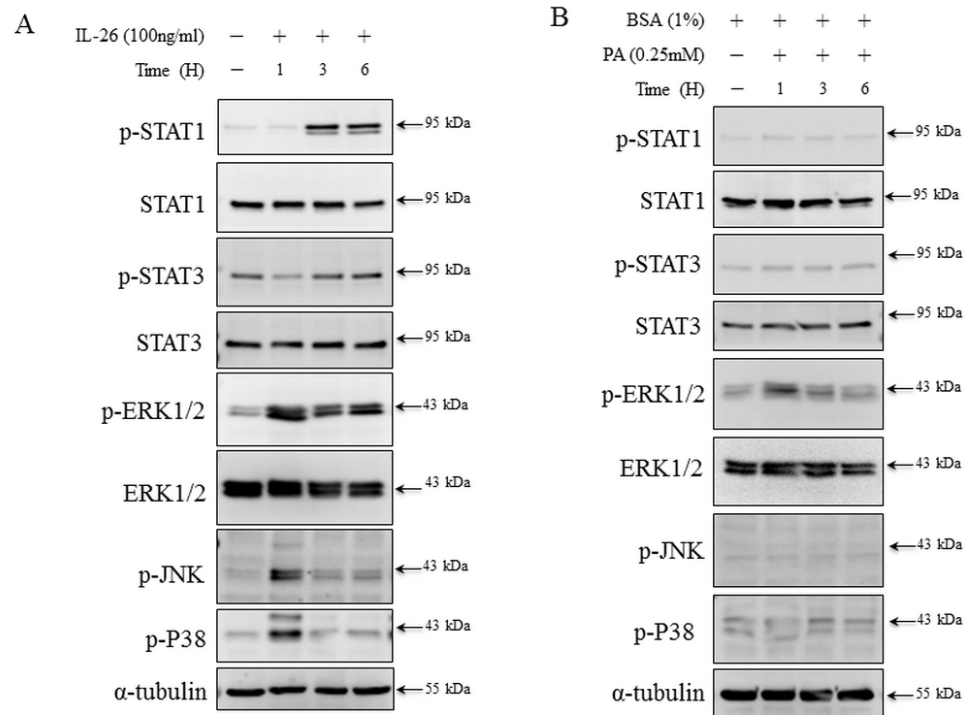

**Supplemental Figure S1.** IL-26 and palmitate induced activation of several signaling pathways in HACs. Cells were untreated or treated with 100 ng/ml of IL-26 and with 0.25 mM palmitate for 1 h under serum-free conditions. The cells were harvested and proteins were extracted for analysis of several signaling pathways by western blot analysis immediately after treatment and 1 h after depletion of (A) IL-26 and (B) palmitate.
